# Supplementary material for: Phytochemical Profile, Antioxidant and Cytotoxic Potential of Capsicum annuum (L.) Dry Hydro-Ethanolic Extract
Source: MDPI journal article supplement (doi:10.3390/pharmaceutics16020245), 2024-02-07
Supplement: s1 [file s1]

## Supplementary Material

# Phytochemical Profile, Antioxidant and Cytotoxic Potential of *Capsicum Annuum* (L.) Dry Hydro-Ethanollic Extract

Ionuț Mădălin Ivan<sup>1</sup>, Violeta Popovici<sup>2,\*</sup>, Carmen Lidia Chițescu<sup>3</sup>, Liliana Popescu<sup>1</sup>, Emanuela Alice Luță<sup>1</sup>, Elena Iuliana Ilie<sup>1</sup>, Lorelei Irina Brașoveanu<sup>4</sup>, Camelia Mia Hotnog<sup>4</sup>, Octavian Tudorel Olaru<sup>1\*</sup>, George Mihai Nițulescu<sup>1</sup>, Rica Boscencu<sup>1</sup> and Cerasela Elena Gîrd<sup>1</sup>

<sup>1</sup> Faculty of Pharmacy, University of Medicine and Pharmacy "Carol Davila", Traian Vuia 6, 020956 Bucharest, Romania; [ionut.ivan@drd.umfcd.ro](mailto:ionut.ivan@drd.umfcd.ro) (I.M.I.); [liliana.popescu22@umfcd.ro](mailto:liliana.popescu22@umfcd.ro) (L.P.); [emanuela.luta@umfcd.ro](mailto:emanuela.luta@umfcd.ro) (E.A.L.); [elena.ionita@drd.umfcd.ro](mailto:elena.ionita@drd.umfcd.ro) (E.I.I.); [octavian.olaru@umfcd.ro](mailto:octavian.olaru@umfcd.ro) (O.T.O.); [george.nitulescu@umfcd.ro](mailto:george.nitulescu@umfcd.ro) (G.M.N.); [rica.boscencu@umfcd.ro](mailto:rica.boscencu@umfcd.ro) (R.B.); [cerasela.gird@umfcd.ro](mailto:cerasela.gird@umfcd.ro) (C.E.G.);

<sup>2</sup> "Costin C. Kirițescu" National Institute of Economic Research—Center for Mountain Economics (INCE-CEMONT), Romanian Academy, 725700 Vatra-Dornei, Romania; [violeta.popovici@ce-mont.ro](mailto:violeta.popovici@ce-mont.ro) (V.P.)

<sup>3</sup> Faculty of Medicine and Pharmacy, "Dunărea de Jos" University of Galați, A.I. Cuza 35, 800010 Galați, Romania; [carmen.chitescu@ugal.ro](mailto:carmen.chitescu@ugal.ro) (C.L.C.);

<sup>4</sup> Center of Immunology, "Stefan S. Nicolau" Institute of Virology, Romanian Academy, 285 Mihai Bravu Ave., 030304 Bucharest, Romania; [lozelei.brasoveanu@virology.ro](mailto:lozelei.brasoveanu@virology.ro) (L.I.B.); [camelia.hotnog@virology.ro](mailto:camelia.hotnog@virology.ro) (C.M.H.);

\* Correspondence: [violeta.popovici@ce-mont.ro](mailto:violeta.popovici@ce-mont.ro) (V.P.); [octavian.olaru@umfcd.ro](mailto:octavian.olaru@umfcd.ro) (O.T.O.).

## Results

Table S1 displays the bioactive phytochemicals identified in CAE by UHPLC-HRMS/MS, using m/z and Rt values. They belong to different classes of phenolic secondary metabolites (flavonoids, flavanols, flavanones, isoflavones, terpenoids, diterpenes, tannins, phenolic acids, polyphenols, and capsaicin derivatives).

**Table S1.** Bioactive phenolic constituents and capsaicin-derived compounds identified in CAE by UHPLC HRMS/MS.

| Nr. crt. | Identified Compound              | Chemical Formula                                | Adduct Ion/<br>Monitored<br>Negative Ion | Retention<br>Times<br>(Minutes) | Phytochemical<br>Classification |
|----------|----------------------------------|-------------------------------------------------|------------------------------------------|---------------------------------|---------------------------------|
| 1        | Quercetin                        | C <sub>15</sub> H <sub>10</sub> O <sub>7</sub>  | 301.035                                  | 14.95                           | Flavonoid                       |
| 2        | Rutin (Quercetin 3-O-rutinoside) | C <sub>27</sub> H <sub>30</sub> O <sub>16</sub> | 609.146                                  | 13.33                           | Flavonoid                       |
| 3        | Apigenin                         | C <sub>15</sub> H <sub>10</sub> O <sub>5</sub>  | 269.045                                  | 16.68                           | Flavonoid                       |
| 4        | Kaempferol                       | C <sub>15</sub> H <sub>10</sub> O <sub>6</sub>  | 285.040                                  | 16.49                           | Flavanol                        |
| 5        | Nepetin (6-methoxy luteolin)     | C <sub>16</sub> H <sub>12</sub> O <sub>7</sub>  | 315.051                                  | 16.69                           | Flavonoid                       |
| 6        | Naringenin                       | C <sub>15</sub> H <sub>12</sub> O <sub>5</sub>  | 271.061                                  | 15.43                           | Flavanone                       |
| 7        | Hesperetin                       | C <sub>16</sub> H <sub>14</sub> O <sub>6</sub>  | 301.071                                  | 15.93                           | Flavonoid                       |
| 8        | Pinocembrin                      | C <sub>15</sub> H <sub>12</sub> O <sub>4</sub>  | 255.066                                  | 18.33                           | Flavonoid                       |
| 9        | Chrysin                          | C <sub>15</sub> H <sub>10</sub> O <sub>4</sub>  | 253.050                                  | 14.49                           | Flavonoid                       |
| 10       | Galangin                         | C <sub>15</sub> H <sub>10</sub> O <sub>5</sub>  | 269.045                                  | 16.68                           | Flavonoid                       |

|    |                                           |                                                 |         |             |                          |
|----|-------------------------------------------|-------------------------------------------------|---------|-------------|--------------------------|
| 11 | Hyperoside (Quercetin 3-O-galactoside)    | C <sub>21</sub> H <sub>20</sub> O <sub>12</sub> | 463.087 | 12.32       | Flavonol glycoside       |
| 12 | Genistin                                  | C <sub>21</sub> H <sub>20</sub> O <sub>10</sub> | 431.098 | 13.3        | Isoflavone               |
| 13 | Genistein                                 | C <sub>15</sub> H <sub>10</sub> O <sub>5</sub>  | 269.045 | 16.68       | Isoflavone               |
| 14 | Daidzein                                  | C <sub>15</sub> H <sub>10</sub> O <sub>4</sub>  | 253.050 | 18.98       | Isoflavone               |
| 15 | Glycitein                                 | C <sub>16</sub> H <sub>12</sub> O <sub>5</sub>  | 283.061 | 19.52       | Isoflavone               |
| 16 | Gallic acid                               | C <sub>7</sub> H <sub>6</sub> O <sub>5</sub>    | 169.014 | 1.69        | Hydroxybenzoic acid      |
| 17 | Chlorogenic acid                          | C <sub>16</sub> H <sub>18</sub> O <sub>9</sub>  | 353.087 | 6.08        | Cinnamate ester          |
| 18 | Ferulic acid                              | C <sub>10</sub> H <sub>10</sub> O <sub>4</sub>  | 193.050 | 9.92        | Hydroxycinnamic acid     |
| 19 | Absciscic acid                            | C <sub>15</sub> H <sub>20</sub> O <sub>4</sub>  | 263.128 | 14.72       | Terpenoid                |
| 20 | <i>p</i> -Coumaric acid                   | C <sub>9</sub> H <sub>8</sub> O <sub>3</sub>    | 163.039 | 8.7         | Hydroxycinnamic acid     |
| 21 | Biochanin A                               | C <sub>16</sub> H <sub>12</sub> O <sub>5</sub>  | 283.061 | 19.52       | Isoflavone               |
| 22 | Sissotrin (biochanin A 7-O-β-D-glucoside) | C <sub>22</sub> H <sub>22</sub> O <sub>10</sub> | 445.114 | 14.03       | Flavonoid                |
| 23 | 5,7-Dihydroxy-2'-methoxy Isoflavone       | C <sub>22</sub> H <sub>12</sub> O <sub>5</sub>  | 283.061 | 19.52       | Isoflavone               |
| 24 | Irilone                                   | C <sub>16</sub> H <sub>10</sub> O <sub>6</sub>  | 297.040 | 14.69       | Isoflavone               |
| 25 | Baptigenin                                | C <sub>15</sub> H <sub>10</sub> O <sub>6</sub>  | 285.040 | 15.5        | Isoflavone               |
| 26 | Pratensein/Chrysoeriol                    | C <sub>16</sub> H <sub>12</sub> O <sub>6</sub>  | 299.056 | 16.78/18.39 | Isoflavone               |
| 27 | Irisolidone                               | C <sub>17</sub> H <sub>14</sub> O <sub>6</sub>  | 313.071 | 17.68       | Isoflavone               |
| 28 | Kaempferol-3-O-rutinoside                 | C <sub>27</sub> H <sub>30</sub> O <sub>15</sub> | 593.151 | 9.33        | Flavonol glycoside       |
| 29 | Kaempferol/Luteolin-7-O-β-D-glucoside     | C <sub>21</sub> H <sub>20</sub> O <sub>11</sub> | 447.093 | 13.45       | Flavonoid                |
| 30 | Chrysoeriol 7-O-glycoside                 | C <sub>22</sub> H <sub>22</sub> O <sub>11</sub> | 461.108 | 14.76       | Flavonoid-7-o-glycosides |
| 31 | Tricin                                    | C <sub>17</sub> H <sub>14</sub> O <sub>7</sub>  | 329.066 | 16.65       | Flavonoid                |
| 32 | Azelaic acid                              | C <sub>9</sub> H <sub>16</sub> O <sub>4</sub>   | 187.097 | 13.96       | Dicarboxylic acid        |
| 33 | Apigenin 7-O-glucosylglucoside            | C <sub>27</sub> H <sub>30</sub> O <sub>15</sub> | 593.151 | 9.33        | Flavonoid                |
| 34 | Rosmarinic acid                           | C <sub>18</sub> H <sub>16</sub> O <sub>8</sub>  | 359.077 | 13.41       | Ester of caffeic acid    |
| 35 | Carnosol                                  | C <sub>20</sub> H <sub>26</sub> O <sub>4</sub>  | 329.175 | 22.66       | Diterpene                |
| 36 | Carnosic acid                             | C <sub>20</sub> H <sub>28</sub> O <sub>4</sub>  | 331.191 | 21.99       | Diterpene                |
| 37 | Rosmanol/Epirosmanol                      | C <sub>20</sub> H <sub>26</sub> O <sub>5</sub>  | 345.170 | 16.60/19.00 | Diterpene                |
| 38 | Rosmadial/isomers                         | C <sub>20</sub> H <sub>24</sub> O <sub>5</sub>  | 343.155 | 20.35       | Diterpene lactone        |
| 39 | Diosmin (Diosmetin 7-O-rutinoside)        | C <sub>28</sub> H <sub>32</sub> O <sub>15</sub> | 607.166 | 13.71       | Flavonoid                |
| 40 | Rosmanol methyl ether                     | C <sub>21</sub> H <sub>28</sub> O <sub>5</sub>  | 359.186 | 20.28       | Diterpene derivative     |
| 41 | Neochlorogenic acid                       | C <sub>16</sub> H <sub>18</sub> O <sub>9</sub>  | 353.087 | 6.08        | Cinnamate ester          |
| 42 | Oleanolic acid                            | C <sub>30</sub> H <sub>48</sub> O <sub>3</sub>  | 455.353 | 24.99       | Pentacyclic triterpenoid |
| 43 | Hispidulin 7-rutinoside/isomers           | C <sub>28</sub> H <sub>32</sub> O <sub>15</sub> | 607.166 | 13.71       | Flavonoid                |
| 44 | Hispidulin                                | C <sub>16</sub> H <sub>12</sub> O <sub>6</sub>  | 299.056 | 18.39       | Flavonoid                |
| 45 | Salvianolic acid B                        | C <sub>36</sub> H <sub>30</sub> O <sub>16</sub> | 717.146 | 11.72       | Polyphenolic acid        |
| 46 | Gallocatechin/Epigallocatechin            | C <sub>15</sub> H <sub>14</sub> O <sub>7</sub>  | 305.066 | 1.43        | Flavan-3-ol              |

|    |                                         |                                                               |         |             |                             |
|----|-----------------------------------------|---------------------------------------------------------------|---------|-------------|-----------------------------|
| 47 | Ursolic acid                            | C <sub>30</sub> H <sub>48</sub> O <sub>3</sub>                | 455.353 | 24.99       | Pentacyclic triterpene acid |
| 48 | Miquelianin (Quercetin 3-O-glucuronide) | C <sub>21</sub> H <sub>18</sub> O <sub>13</sub>               | 477.067 | 10.37       | Flavonol glucuronide        |
| 49 | Spicoside A                             | C <sub>30</sub> H <sub>26</sub> O <sub>15</sub>               | 625.119 | 13.08       | Acylated flavone glycoside  |
| 50 | Quinic acid                             | C <sub>7</sub> H <sub>12</sub> O <sub>6</sub>                 | 191.056 | 0.64        | Cyclohexanecarboxylic acid  |
| 51 | Coumaroylquinic acid                    | C <sub>16</sub> H <sub>18</sub> O <sub>8</sub>                | 337.092 | 7.97        | Quinic acid derivative      |
| 52 | Quercetin-3-O-rutinoside                | C <sub>33</sub> H <sub>40</sub> O <sub>21</sub>               | 771.198 | 8.93        | Flavonoid                   |
| 53 | Sinapic acid                            | C <sub>11</sub> H <sub>12</sub> O <sub>5</sub>                | 223.061 | 10.3        | Hydroxycinnamic acid        |
| 54 | Hidroxy ferulic acid/isomers            | C <sub>16</sub> H <sub>20</sub> O <sub>10</sub>               | 371.098 | 6.63        | Hydroxycinnamic acid        |
| 55 | Valerenic acid                          | C <sub>15</sub> H <sub>22</sub> O <sub>2</sub>                | 233.154 | 21.2        | Sesquiterpenoid             |
| 56 | Quercetin 3-(6-malonyl)-glucoside       | C <sub>24</sub> H <sub>22</sub> O <sub>15</sub>               | 549.088 | 12.82       | Flavonoid                   |
| 57 | Lehmannin                               | C <sub>25</sub> H <sub>28</sub> O <sub>5</sub>                | 407.186 | 26.33       | Flavanone                   |
| 58 | Alopecurone A                           | C <sub>39</sub> H <sub>38</sub> O <sub>9</sub>                | 649.244 | 16.78       | Flavonostilbene             |
| 59 | Cyanidin 3-O-glucoside                  | C <sub>21</sub> H <sub>21</sub> ClO <sub>11</sub>             | 483.069 | 13.45       | Anthocyanin                 |
| 60 | Inosine                                 | C <sub>10</sub> H <sub>12</sub> N <sub>4</sub> O <sub>5</sub> | 267.073 | 1.38        | Nucleoside                  |
| 61 | Cyanidin 3-sambubioside                 | C <sub>26</sub> H <sub>29</sub> ClO <sub>15</sub>             | 615.112 | 12.27       | Anthocyanidin-3-o-glycoside |
| 62 | Taxifolin 3-O-rhamnoside                | C <sub>21</sub> H <sub>22</sub> O <sub>11</sub>               | 449.108 | 12.73       | Flavonoid                   |
| 63 | 3-Hydroxy-beta-lapachone                | C <sub>15</sub> H <sub>14</sub> O <sub>4</sub>                | 257.081 | 17.37       | o-naphthoquinone            |
| 64 | Retinoic acid                           | C <sub>20</sub> H <sub>28</sub> O <sub>2</sub>                | 299.201 | 22.38       | Retinol derivative          |
| 65 | Quercetine 3-O-xyloside                 | C <sub>20</sub> H <sub>18</sub> O <sub>11</sub>               | 433.077 | 13.31       | Flavonoid                   |
| 66 | Lignan                                  | C <sub>25</sub> H <sub>30</sub> O <sub>8</sub>                | 457.186 | 27.3        | Polyphenolic compound       |
| 67 | Lignan P                                | C <sub>27</sub> H <sub>30</sub> O <sub>13</sub>               | 561.161 | 23.08       | Polyphenolic compound       |
| 68 | Secoisolariciresinol/isomers            | C <sub>20</sub> H <sub>26</sub> O <sub>6</sub>                | 361.165 | 15.43/25.39 | Polyphenolic compound       |
| 69 | Vanilic acid glucoside                  | C <sub>14</sub> H <sub>18</sub> O <sub>9</sub>                | 329.087 | 4.4         | Hydrolyzable tannin         |
| 70 | Cyanidin-3-arabioside                   | C <sub>20</sub> H <sub>19</sub> ClO <sub>10</sub>             | 453.059 | 7.17        | Anthocyanidin-3-o-glycoside |
| 71 | Capsaicin                               | C <sub>18</sub> H <sub>27</sub> NO <sub>3</sub>               | 304.191 | 19.61       | Alkaloid                    |
| 72 | Dihydrocapsaicin                        | C <sub>18</sub> H <sub>29</sub> NO <sub>3</sub>               | 306.207 | 20.54/22.43 | Alkaloid                    |
| 73 | Nonivamide (Nordihydrocapsaicin)        | C <sub>17</sub> H <sub>27</sub> NO <sub>3</sub>               | 292.191 | 19.97       | Alkaloid                    |
| 74 | Homodihydrocapsaicin                    | C <sub>19</sub> H <sub>31</sub> NO <sub>3</sub>               | 320.223 | NF          | Alkaloid                    |
| 75 | Norcapsaicin                            | C <sub>17</sub> H <sub>25</sub> NO <sub>3</sub>               | 290.176 | 18.97       | Alkaloid                    |
| 76 | Capsaicinol                             | C <sub>18</sub> H <sub>27</sub> NO <sub>4</sub>               | 320.186 | 18.88       | Alkaloid                    |
| 77 | Capsiate                                | C <sub>18</sub> H <sub>26</sub> O <sub>4</sub>                | 305.175 | 19.03       | Alkaloid                    |
| 78 | Dihydrocapsiate                         | C <sub>18</sub> H <sub>28</sub> O <sub>4</sub>                | 307.191 | 19.21       | Alkaloid                    |
| 79 | Nordihydrocapsiate                      | C <sub>17</sub> H <sub>26</sub> O <sub>4</sub>                | 293.175 | 19.66       | Alkaloid                    |

The results from *in vitro* studies are displayed in Figure S1 for better visualization:

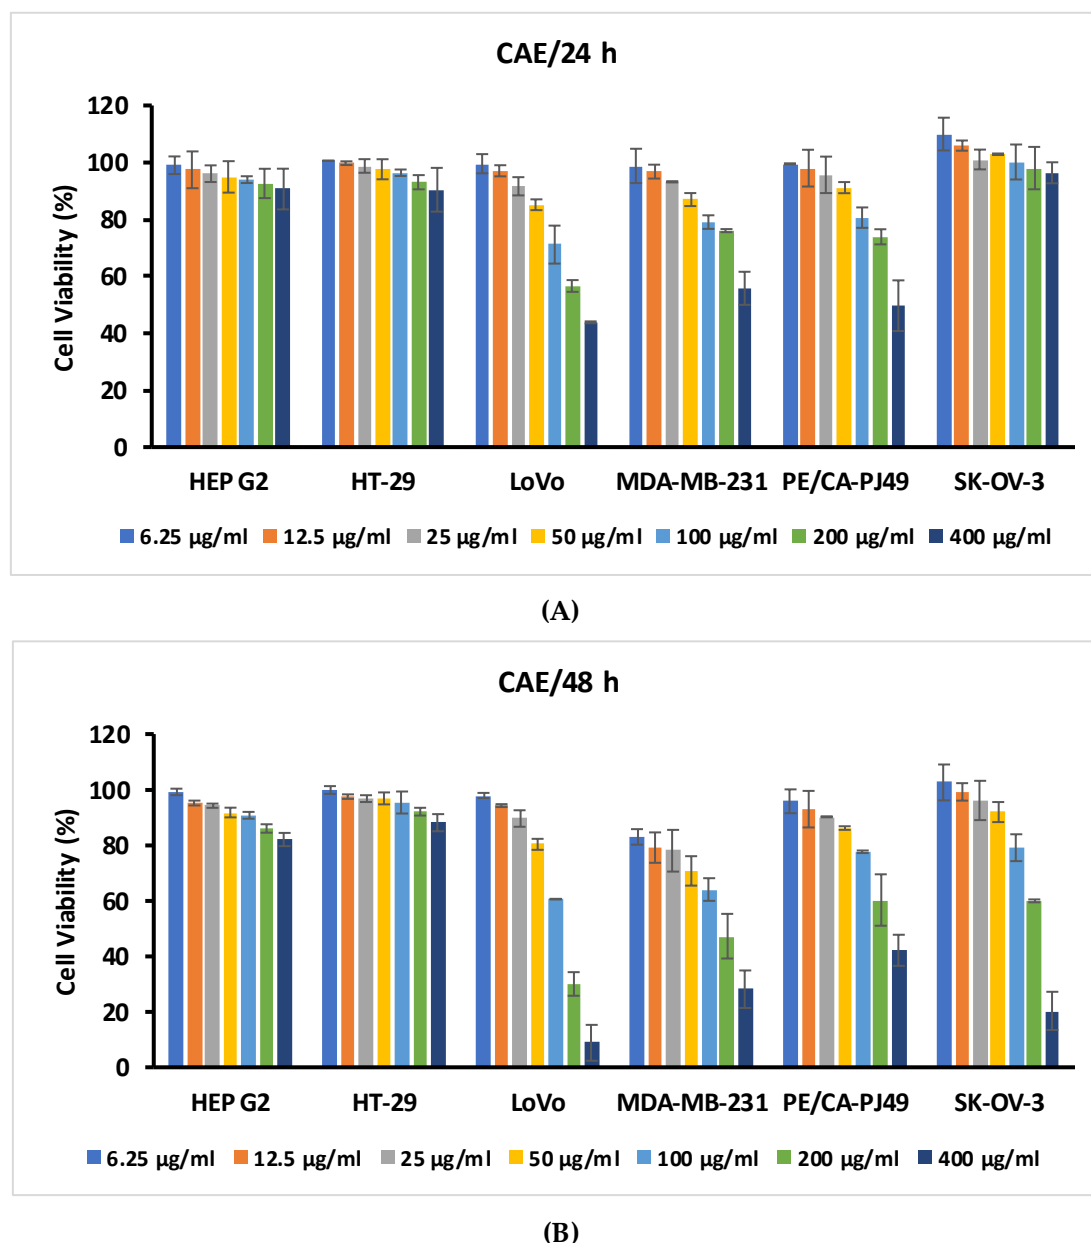

**Figure S1.** The influence of CAE on tumor cell viability at different concentrations after 24 hours (A) and 48 hours (B) exposure. CAE = dried *C. annuum* fruits hydro-ethanolic extract, 24 and 48 = the cell lines exposition time (hours) on the different CAE concentrations (µg/mL). HUVEC — human umbilical endothelial cell; HEP G2 — human hepatocellular carcinoma; HT-29 and LoVo — human colon adenocarcinomas; MDA-MB-231 — human breast adenocarcinoma; PE/CA-PJ49 — human squamous tongue carcinoma; SK-OV-3 — human ovary adenocarcinoma; SD — standard deviation. The superscript letters indicate the significant statistical differences ( $p < 0.05$ ): a, b, c, d in the same column, between rows; x in the same row, between columns. Interpretation of  $IC_{50}$  values is based on that of the National Cancer Institute [109]:  $IC_{50} \leq 20$  µg/mL — strong cytotoxic properties,  $IC_{50} = 21$ –200 µg/mL — moderate cytotoxicity,  $IC_{50} = 201$ –500 µg/mL — low cytotoxicity, and  $IC_{50} \geq 500$  µg/mL — no cytotoxic activity. Data displayed are expressed as mean values  $\pm$  standard deviations (SD) of three different experiments ( $n = 3$ ).

Figure S1 (A and B) shows a direct proportionality between CAE concentration and decreased cell line viability. After 24 hours, the highest CAE cytotoxicity is highlighted on LoVo, PE/CA-PJ49, and MDA-MB-231 (Figure S1A). The 48-hour treatment shows similar results on HEP G2 and HT-29 (Figure S1B). However, the influence of time contact and concentration is merely evident on other cancer cell lines. The 400  $\mu\text{g/mL}$  CAE concentration had a more intense action, progressively decreasing tumor cell viability in the following order: LoVo, SK-OV-3, PE/CA-PJ49, and MDA-MB-231 (Figure S1B).

The results suggest that 100 and 200  $\mu\text{g/mL}$  CAE concentrations generally have similar effects on tested cell line viability, as Figure S2 shows, especially after 24 hours of exposure. CAE at 400  $\mu\text{g/mL}$  acts significantly differently.

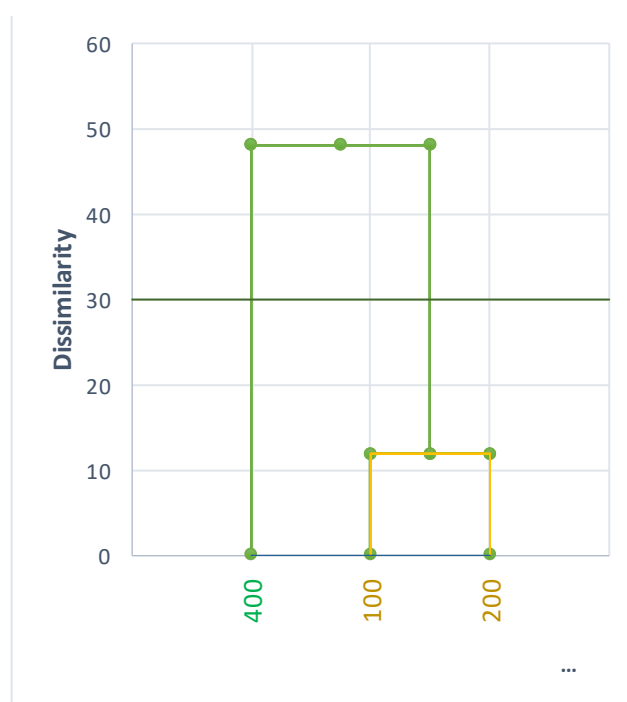

**Figure S2.** Agglomerative Hierarchical Clustering (AHC) Dendrogram, where the CAE concentrations ( $\mu\text{g/mL}$ ) are noted with 100, 200, and 400.

#### 48-Hours Acute Toxicity Test Using *Daphnia Magna* and *Daphnia Pulex*

Capsaicin was tested in low concentrations due to high variability in lethality (L%) within the 7.5-62.5  $\mu\text{g/mL}$  concentration range.

After 24 hours, CAE-induced lethality was  $L\% \leq 10\%$ . After 48 hours,  $L\% = 30 - 90\%$ , without a precise proportionality concentration – effect (Figure S3).

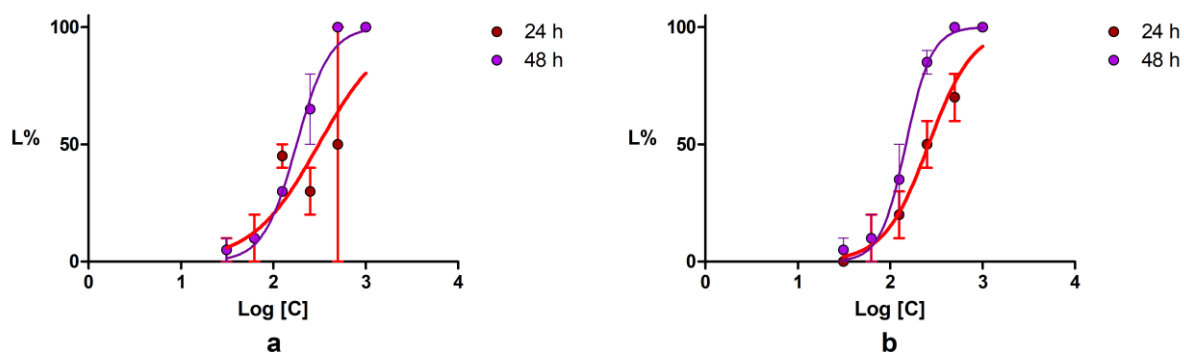

**Figure S3.** The lethality curves were obtained after 24 and 48 h exposure of *Daphnia magna* (a) and *Daphnia pulex* (b) to *Capsicum* extract; error bars represent the SD of two replicates.

## Discussion

**Table S2.** The mechanisms of anticancer effect of capsaicin on various tumor cell lines

| Cell line                                                                     | Cancer type                                         | Mechanism of Action                                                                                                                                                               |
|-------------------------------------------------------------------------------|-----------------------------------------------------|-----------------------------------------------------------------------------------------------------------------------------------------------------------------------------------|
| 1 MCF-7,<br>BT-20,<br>SK-BR-3,<br>MDA-MB-231,<br>T-47D,<br>BT-474,<br>MCF 10A | Breast cancer                                       | Decreasing of mitochondrial membrane's potential,<br>cell-cycle arrest,<br>apoptosis<br>by down-regulating FBI-1-mediated NF-κB pathway                                           |
| 2 HeLa                                                                        | Cervical cancer                                     | Premature senescence,<br>apoptosis<br>mitochondrial dysfunction<br>p53 elevation<br>Apoptosis<br>Autophagy                                                                        |
| 3 T24 BC<br>5637 BC<br>A498 RCC                                               | Genito-urinary cancer<br>(Bladder and renal cancer) | by AMPK/mTOR-pathway<br>DNA Damage<br>p53/ATM/CHK2 and<br>BRCA1/hTERT mRNA expression<br>Oxidative stress<br>Inhibiting Tumor-Associated NADH Oxidase (tNOX) and Sirtuin1 (SIRT1) |
| 4 U87-MG,<br>U251<br>U373                                                     | Glioblastoma                                        | redox imbalance,<br>ferroptosis,<br>though ACSL4/GPx4<br>signaling pathways<br>p53 elevation<br>Autophagy                                                                         |
| 5 ATC                                                                         | Thyroid cancer                                      | through TRPV1 activation<br>and subsequent calcium influx.                                                                                                                        |
| 6 HOS<br>MG63                                                                 | Osteosarcoma                                        | Downregulating SOX2 and EZH2<br>leads to reduced cancer stemness and                                                                                                              |

---

|    |                                                                        |                             |                                                                                                                                                                                                                                                                                                                                                                                                                                                                                                                                                                             |
|----|------------------------------------------------------------------------|-----------------------------|-----------------------------------------------------------------------------------------------------------------------------------------------------------------------------------------------------------------------------------------------------------------------------------------------------------------------------------------------------------------------------------------------------------------------------------------------------------------------------------------------------------------------------------------------------------------------------|
|    |                                                                        |                             | inhibits metastasis<br>Cell death through<br>TRPV1-dependent and<br>-independent pathways.<br>Apoptotic and<br>antiproliferative effect<br>Modulation of<br>Hedgehog pathway,<br>apoptosis                                                                                                                                                                                                                                                                                                                                                                                  |
| 7  | ORL-48                                                                 | OSCC                        |                                                                                                                                                                                                                                                                                                                                                                                                                                                                                                                                                                             |
| 8  | TFK-1,<br>SZ-1                                                         | Cholangio-<br>carcinoma     |                                                                                                                                                                                                                                                                                                                                                                                                                                                                                                                                                                             |
| 9  | SW480,<br>LoVo,<br>HCT 116,<br>CT26,<br>HT-29,<br>COLO 320,<br>COLO205 | Colon<br>cancer             | Cell cycle arrest,<br>apoptosis,<br>changes in cell morphology,<br>DNA fragmentation                                                                                                                                                                                                                                                                                                                                                                                                                                                                                        |
| 10 | AGS,<br>SNU-668,<br>HGC-27                                             | Stomach<br>cancer           | Apoptosis,<br>Inhibition of cell proliferation<br>downregulation of several pathways (NADPH,<br>ERK1/2, p38 MAPK, JNK),<br>inhibition of inflammatory<br>molecules (IL-6),<br>increase of apoptotic molecules<br>(caspase-3, p53).<br>Apoptosis by<br>Apoptosis signal-regulating kinase 1-<br>thioredoxin complex dissociation<br>Mediated FOXO-1 Acetylation<br>Inhibition of $\beta$ -Catenin signaling<br>by disrupting the nuclear $\beta$ -Catenin/TCF-1<br>complex                                                                                                   |
| 11 | AsPC-1,<br>BxPC-3,<br>PANC-1                                           | Pancreatic<br>cancer        | Oxidative stress and<br>mitochondrial death pathway<br>phosphoinositide 3-kinase/Akt pathway<br>Apoptosis<br>by Involvement of NADPH Oxidase-mediated<br>ROS-Generation<br>Decreasing of mitochondrial<br>membrane's potential,<br>Apoptosis induced by<br>ceramide accumulation,<br>neutral sphingomyelinase,<br>JNK activation<br>AMPK activation<br>through LKB1 Kinase<br>and TRPV1 Receptors<br>suppressing cell growth,<br>inhibition of mitochondrial respiration,<br>increase in intracellular oxygen contents,<br>inhibiting HIF-1 $\alpha$ pathway<br>ferroptosis |
| 12 | Hep G2,<br>Hep 3B                                                      | Hepatocellular<br>carcinoma |                                                                                                                                                                                                                                                                                                                                                                                                                                                                                                                                                                             |
| 13 | LNCaP,<br>PC-3,<br>DU 145                                              | Prostate<br>cancer          |                                                                                                                                                                                                                                                                                                                                                                                                                                                                                                                                                                             |
| 14 | A549,<br>H1299,<br>H2009,<br>H23                                       | Lung cancer                 |                                                                                                                                                                                                                                                                                                                                                                                                                                                                                                                                                                             |

---

---

|    |             |          |                                         |
|----|-------------|----------|-----------------------------------------|
|    |             |          | by inactivating SLC7A11/GPX4 signaling. |
|    | CCR-CEM     |          |                                         |
|    | CEM/ADR5000 |          |                                         |
|    | NB4,        |          |                                         |
|    | UF-1,       |          |                                         |
| 15 | Kasumi-1,   | Leukemia | Apoptosis,                              |
|    | HL-60,      |          | Antiproliferative activity              |
|    | K-562,      |          |                                         |
|    | KU812       |          |                                         |
|    | U937        |          |                                         |

---
